# Supplementary material
Source: PubMed Central journal article supplement (PMC2206574)

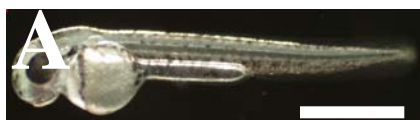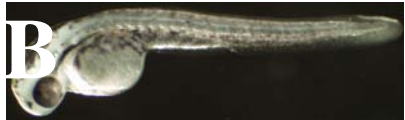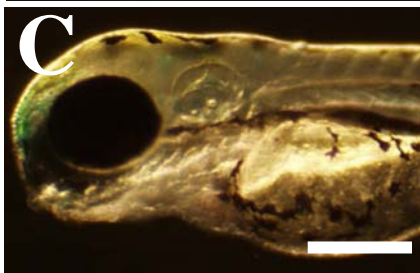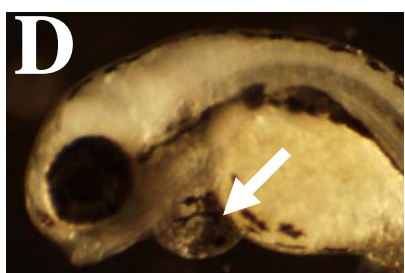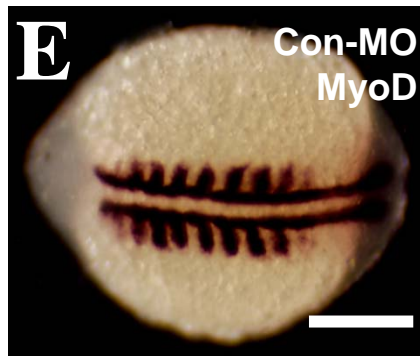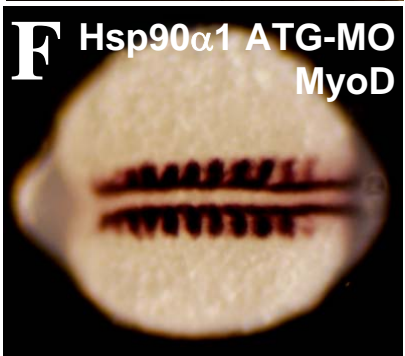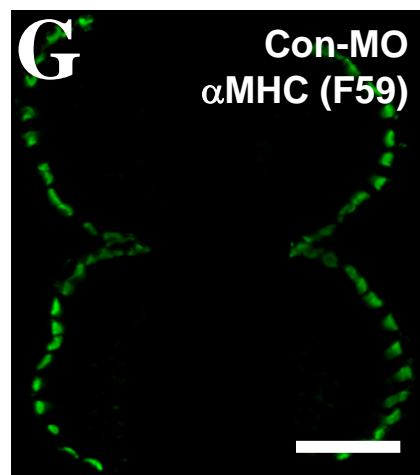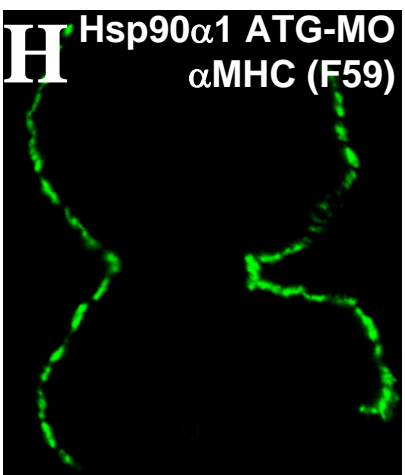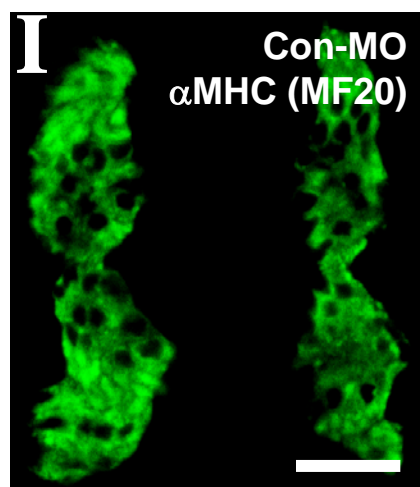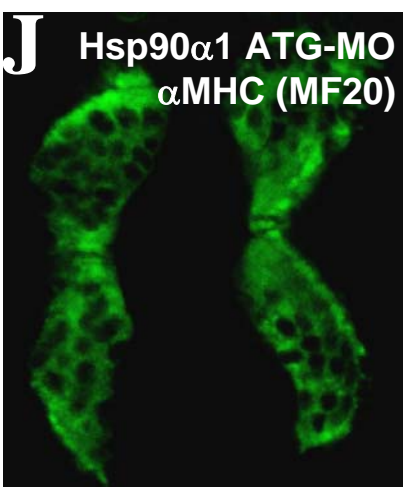

Supplement: pnas_0707330105_1.pdf [file pnas_0707330105_1.pdf]

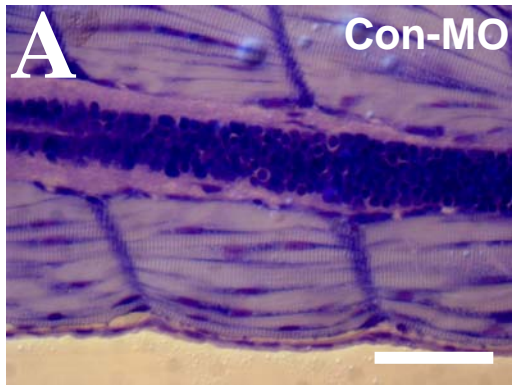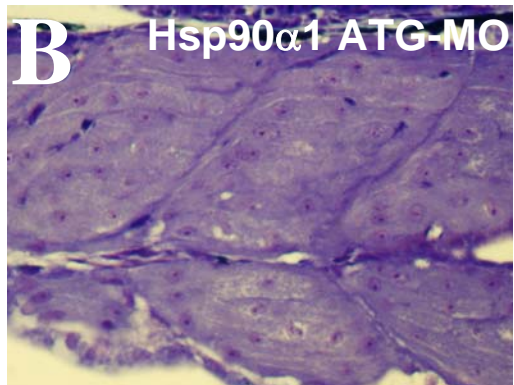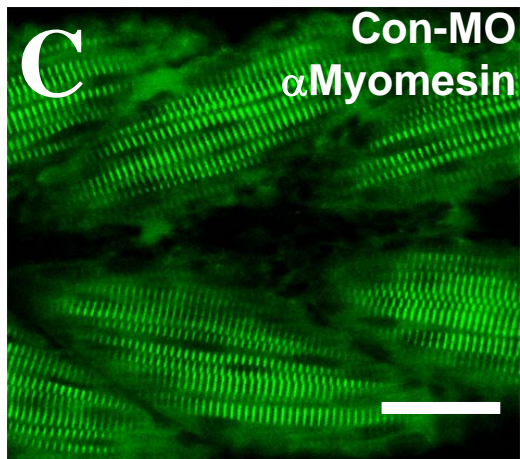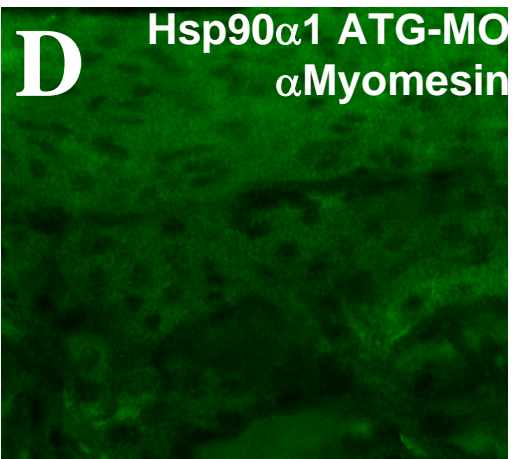

Supplement: pnas_0707330105_2.pdf [file pnas_0707330105_2.pdf]

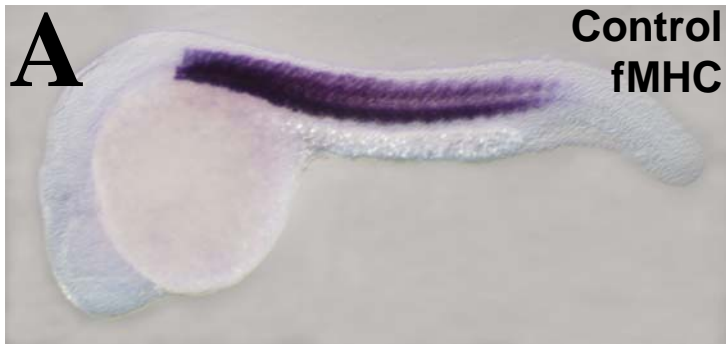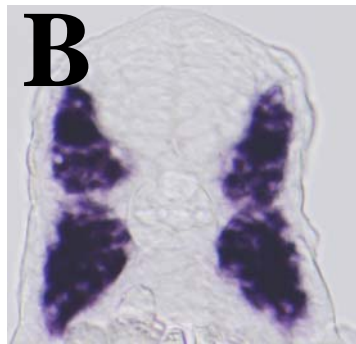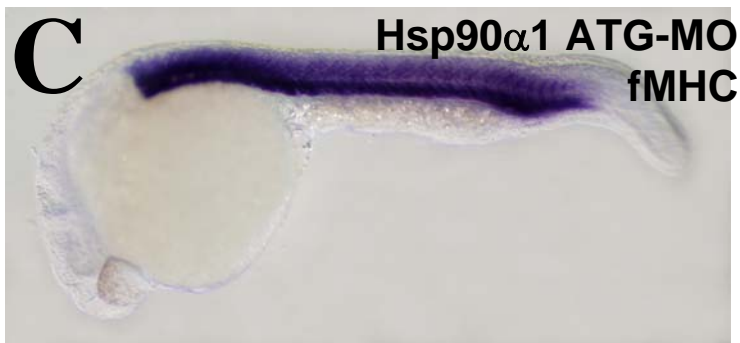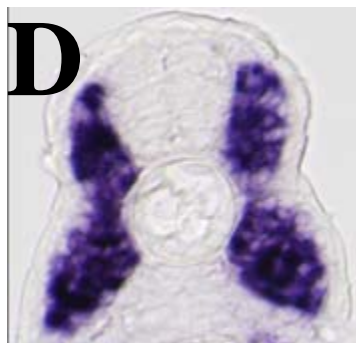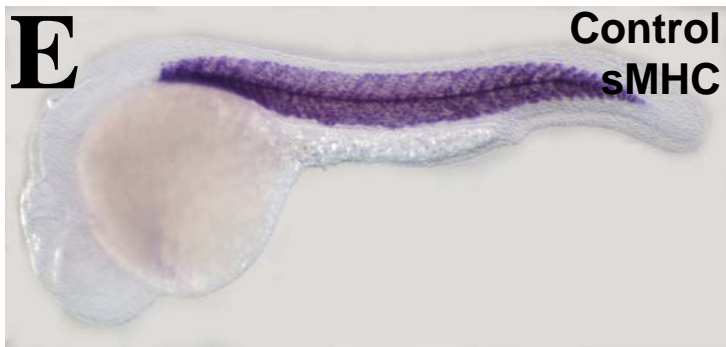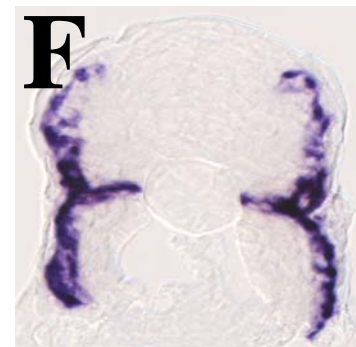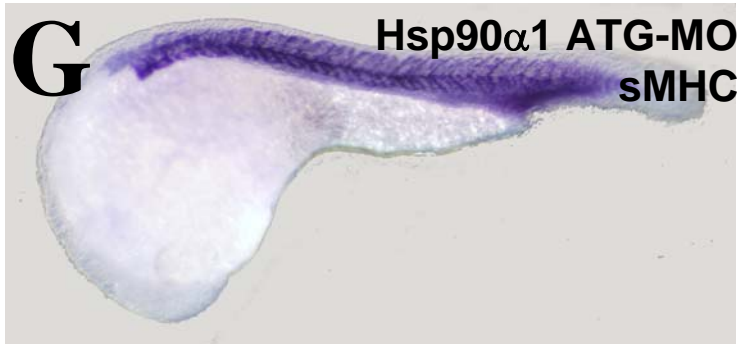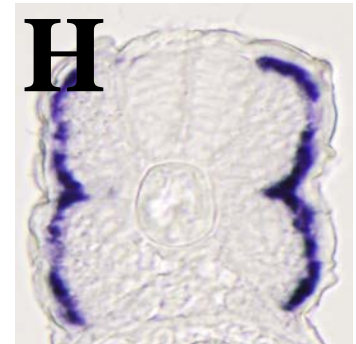

Supplement: pnas_0707330105_3.pdf [file pnas_0707330105_3.pdf]

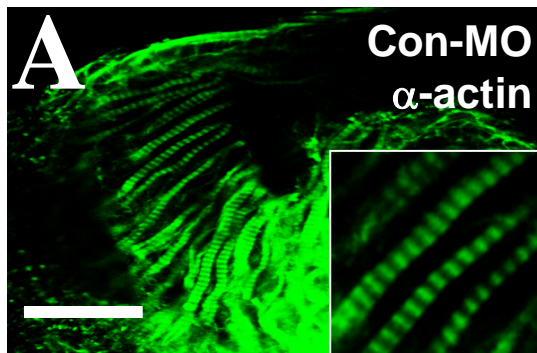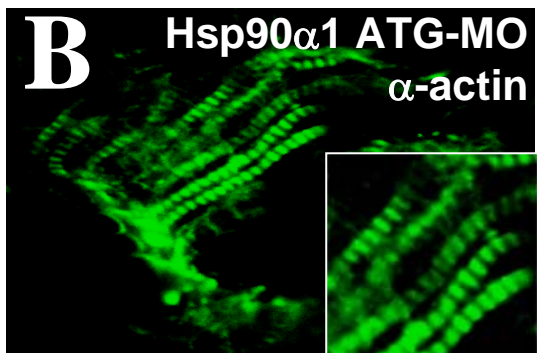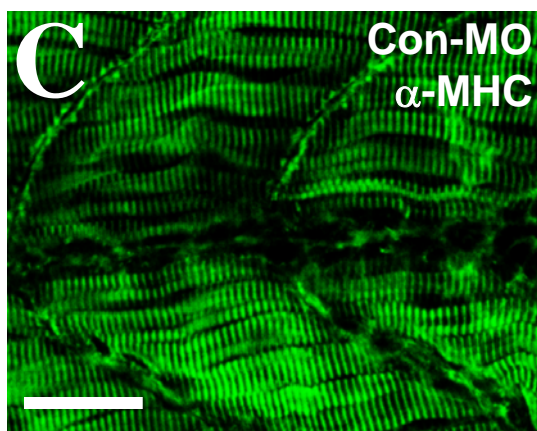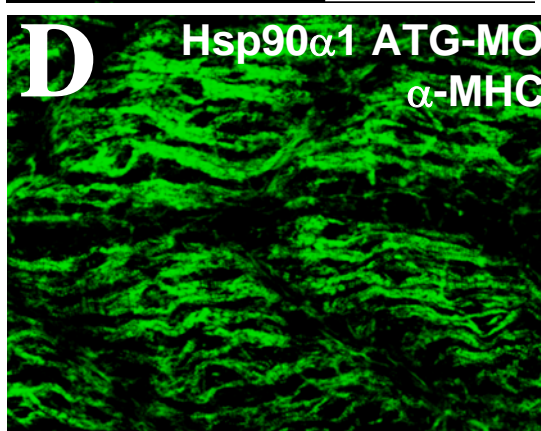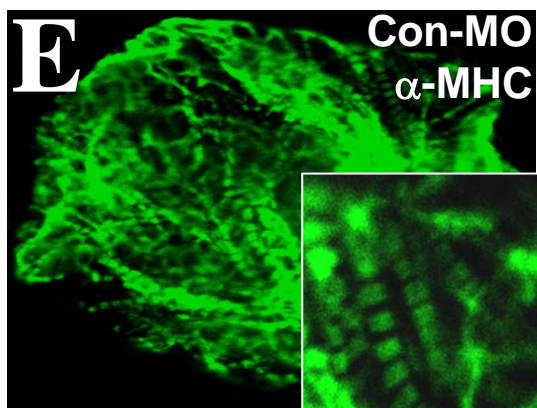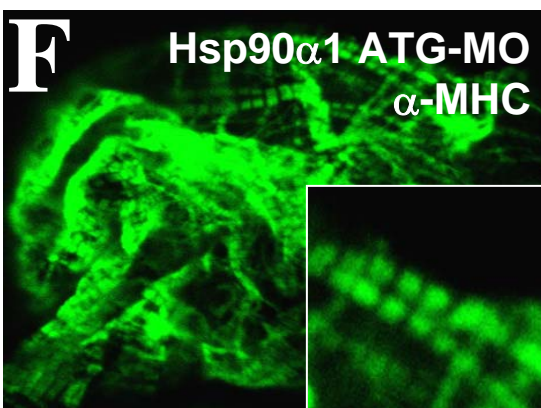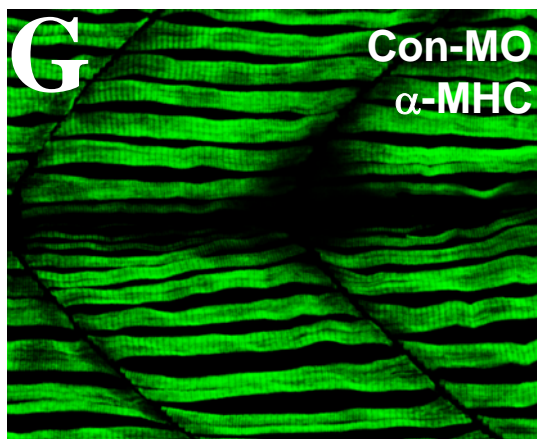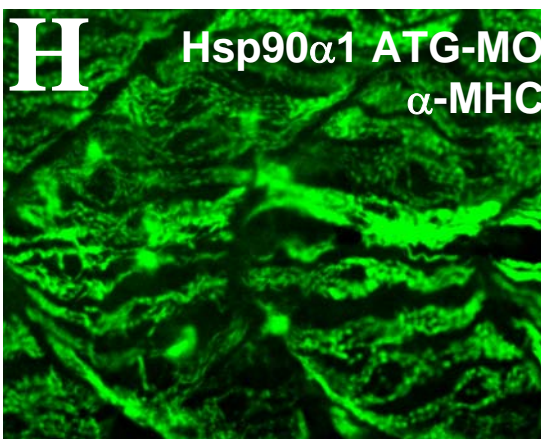

Supplement: pnas_0707330105_4.pdf [file pnas_0707330105_4.pdf]
